# Supplementary material for: A copper-functionalized zirconium metal–organic framework for catalytic oxidative carboxylation of olefins and CO2
Source: Royal Society of Chemistry journal article supplement (doi:10.1039/d4nj00076e), 2024-01-01
Supplement: d4nj00076e1.pdf [file d4nj00076e1.pdf]

Supporting Information for

**A copper-functionalized zirconium metal-organic framework for  
catalytic oxidative carboxylation of olefins and CO<sub>2</sub>**

Y B. N. Tran,<sup>ab</sup> Phuong T. K. Nguyen,<sup>\*ab</sup> Vinh-Ai Dao,<sup>c</sup> and Van-Dung Le<sup>d</sup>

<sup>a</sup>Institute of Fundamental and Applied Sciences, Duy Tan University, Ho Chi Minh City 700000,  
Viet Nam

<sup>b</sup>Faculty of Natural Sciences, Duy Tan University, Da Nang, 550000, Viet Nam.

<sup>c</sup>Department of Physics, Faculty of Applied Sciences, HCMC University of Technology and  
Education, Ho Chi Minh City 700000, Vietnam

<sup>d</sup>Institute of Chemical Technology, Vietnam Academy of Science and Technology, Ho Chi Minh  
City 700000, Vietnam

\*To whom correspondence should be addressed: Email, [nguyentkieuphuong1@duytan.edu.vn](mailto:nguyentkieuphuong1@duytan.edu.vn).

## Table of Contents

|                   |                                                                 |           |
|-------------------|-----------------------------------------------------------------|-----------|
| <b>Section S1</b> | Materials and Analytical Techniques                             | S3 – S4   |
| <b>Section S2</b> | Characterizations of Zr-CPB and Zr-CPB-Cu                       | S5 – S8   |
| <b>Section S3</b> | Powder X-Ray Diffraction and Structural Refinement of Zr-CPB-Cu | S9 – S14  |
| <b>Section S4</b> | Gas Adsorption Studies of Zr-MOFs                               | S15 – S16 |
| <b>Section S5</b> | Catalytic Oxidative Carboxylation Studies of Zr-MOFs            | S17 – S22 |
| <b>Section S6</b> | Post-Cycling Characterizations of Recycled Zr-CPB-Cu            | S23 – S24 |
| <b>Section S7</b> | References                                                      | S25       |

## Section S1: Materials and Analytical Techniques

### Chemicals and Materials

Copper (I) iodide (CuI,  $\geq 99.5\%$ ), copper (II) chloride (CuCl<sub>2</sub>, 97%), zirconium(IV) oxychloride octahydrate (ZrOCl<sub>2</sub>·8H<sub>2</sub>O, 99.5%), 1,8-diazabicycloundec-7-ene (DBU,  $\geq 99.0\%$ ), sodium hydroxide (NaOH, reagent grade,  $\geq 98\%$ ), hydrochloric acid (HCl, 1 M), 4-methoxystyrene ( $\geq 97.5\%$ ), allylbenzene (98%), 1-allyl-4-methylbenzene (97%), *p*-methoxyallylbenzene (98%), 1-decene ( $\geq 97\%$ ), *tert*-butyl hydroperoxide solution (TBHP, 5.0 – 6.0 M in decane), 2,2,6,6-tetramethylpiperidine 1-oxyl (TEMPO, 98%), hydrogen peroxide solution (H<sub>2</sub>O<sub>2</sub>, 30% in water) and balloon (wall thickness 1 mil) were obtained from Sigma-Aldrich. Methyl-4-iodobenzoate (98%), bis(triphenylphosphine)palladium(II) chloride (PdCl<sub>2</sub>(PPh<sub>3</sub>)<sub>2</sub>, 98%), triethylamine (TEA,  $\geq 99.5\%$ ), trimethylsilylacetylene (98%), dicobalt octacarbonyl (Co<sub>2</sub>(CO)<sub>8</sub>, 95%), anhydrous 1,4-dioxane (99.8%), anhydrous tetrahydrofuran (THF, 99.85%), anhydrous methanol (MeOH, 99.5%), *N,N*-dimethylformamide (DMF, 99.8%), benzoic acid (99.5%), styrene (99.5%), 4-chlorostyrene (97%), cyclohexene (99%), aqueous *tert*-butyl hydroperoxide (TBHP, 70% solution in water), tetrabutylammonium bromide (*n*Bu<sub>4</sub>NBr, 99+%), 1,3-bis(2,6-diisopropylphenyl)imidazolium chloride (DPIC, 97%), hexadecyltrimethylammonium bromide (HTAB, 99+%), 4-dimethylaminopyridine (DMAP, 99%), tetrabutylammonium chloride (*n*Bu<sub>4</sub>NCl, 95%), and *N*-bromosuccinimide (NBS, 99%) were purchased from Acros Organics. Anhydrous dichloromethane (DCM,  $\geq 99.5\%$ ), ethyl acetate (EtOAc,  $\geq 99.5\%$ ), diethyl ether (Et<sub>2</sub>O,  $\geq 99.7\%$ ), hexane ( $\geq 98.5\%$ ), anhydrous sodium sulfate ( $\geq 99\%$ ), ammonium chloride (99.998%), and glacial acetic acid (CH<sub>3</sub>COOH,  $\geq 99.85\%$ ) were obtained from Merck Chemical Co. Triethylamine and deionized water (ultrapure, 17.8 MΩ·cm resistivity, obtained from a Barnstead Easypure II system) were degassed with a stream of N<sub>2</sub> for 5 min prior to addition into the Sonogashira coupling reactions. Deuterated solvents, CDCl<sub>3</sub> and DMSO-*d*<sub>6</sub>, were purchased from Cambridge Isotope Laboratories (Andover, MA). All other chemicals were used without further purification unless otherwise noted.

### Analytical Techniques

Optical microscope images were collected on Nikon SMZ1000 Zoom Stereomicroscope. Elemental microanalyses (EA) were performed on a LECO CHNS-932 Analyzer. Thermal

gravimetric analysis (TGA) was performed on a TA Q500 thermal analysis system with the sample held in a platinum pan in a continuous airflow. Field-emission Scanning Electron Microscope (FE-SEM) was performed on an ultralow voltage imaging with Hitachi's S-4800 FE-SEM operating at an accelerating voltage of 1 kV. Energy dispersive X-ray analyzer (EDX) was conducted on a Horiba H-7593. For inductively coupled plasma analysis (ICP-MS), activated MOF sample (ca. 10 mg) was placed in 30  $\mu\text{L}$  of DCI (20% in  $\text{D}_2\text{O}$ ) and 570  $\mu\text{L}$  of  $\text{DMSO-}d_6$  and then sonicated for 10 min in order to fully digest the MOF and dissolve the linker constituents. X-ray fluorescence (XRF) analysis were carried out using a Bruker M4 Tornado model micro-fluorescence spectrometer.

An Agilent GC System 19091S-433 equipped with a mass selective detector Agilent 7890 (GC-MS) was used to confirm the products using a capillary HP-5MS 5% Phenyl Methyl Silox column (30 m  $\times$  250  $\mu\text{m}$   $\times$  0.25  $\mu\text{m}$ ). The temperature program for GC-MS analysis heated samples from 50  $^\circ\text{C}$  for 2 min; heated from 50 to 300  $^\circ\text{C}$  at 25  $^\circ\text{C}/\text{min}$ ; held at 300  $^\circ\text{C}$  for 5 min. Inlet temperature was set at 250  $^\circ\text{C}$  and He was used as carrier gas with split flow 24.371 mL/min (split ratio 50 : 1). GC-FID analyses were performed using an Agilent GC System 123-0132 equipped with a flame ionization detector and a DB-1ms column (30 m  $\times$  320  $\mu\text{m}$   $\times$  0.25  $\mu\text{m}$ ). The temperature program for GC-FID analysis heated samples from 50  $^\circ\text{C}$  for 2 min; heated from 50 to 250  $^\circ\text{C}$  at 25  $^\circ\text{C}/\text{min}$ ; held at 250  $^\circ\text{C}$  for 4 min. Inlet and detector temperature were set at 250 and 300  $^\circ\text{C}$ , respectively.  $\text{N}_2$  was used as carrier gas with split flow 188.82 mL/min (split ratio 100 : 1). In back detector FID,  $\text{H}_2$  and air flow were conducted with split flow of 30 mL/min and 400 mL/min, respectively. Biphenyl was used as internal standard to calculate the yield of reaction. Recycled MOF catalysts were recovered by centrifugation and wash with DMF (3  $\times$  3 mL), followed by MeOH (3  $\times$  3 mL), and then dried under reduced pressure before reused in the next experiments under the same reaction condition.

## Section S2: Characterizations of Zr-CPB and Zr-CPB-Cu

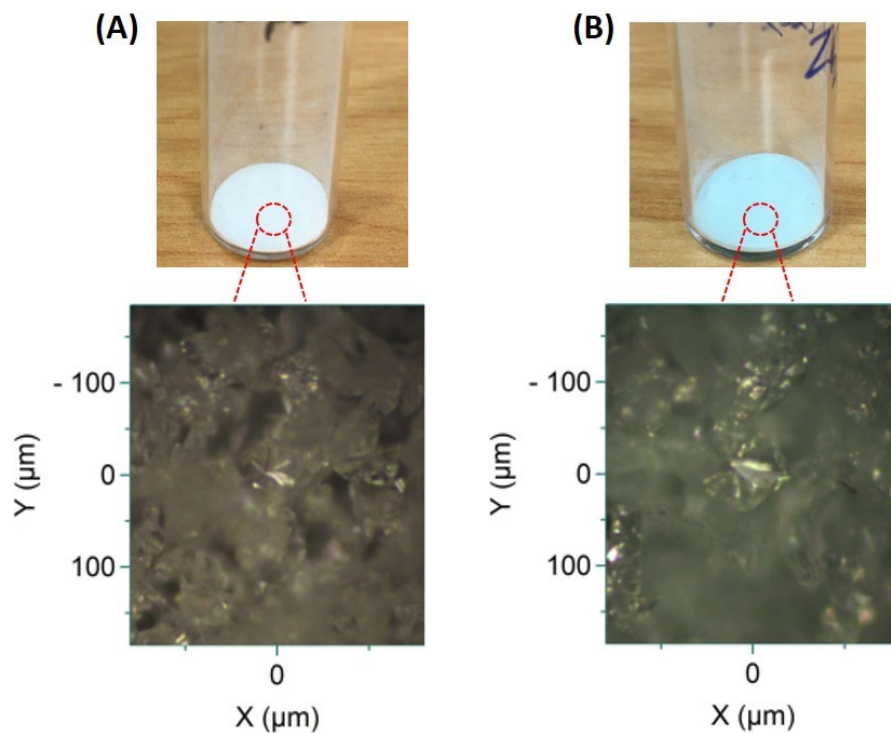

**Figure S1.** Optical microscope image of (A) Zr-CPB and (B) Zr-CPB-Cu crystals.

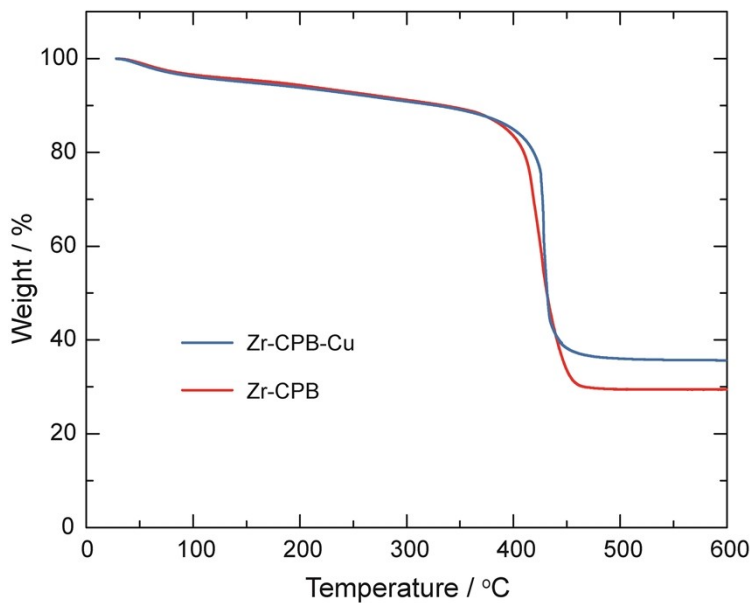

**Figure S2.** TGA traces of activated Zr-CPB (red) and Zr-CPB-Cu (blue) at a heating rate of 5 °C min<sup>-1</sup> under air flow.

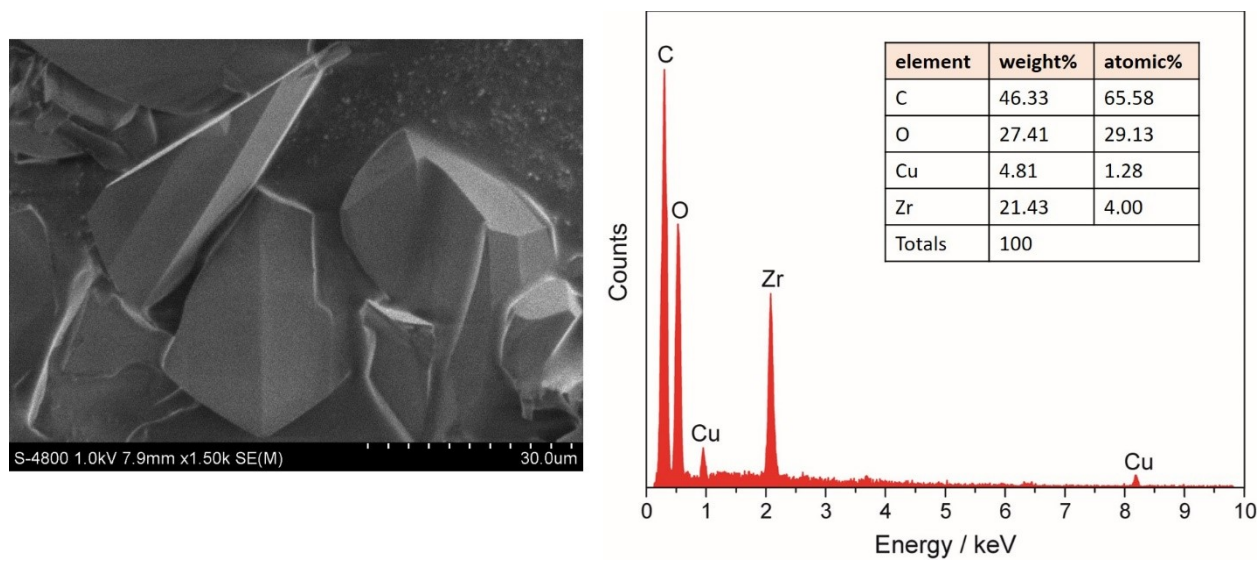

**Figure S2.** SEM-EDS analysis of Zr-CPB-Cu material.

**Table S1.** XRF compositional analysis of the activated Zr-CPB-Cu samples

| Element | Chemical composition at.% |                  |                    |
|---------|---------------------------|------------------|--------------------|
|         | Zr-CPB                    | Zr-CPB-Cu        | recycled Zr-CPB-Cu |
| Cu      | -                         | $4.68 \pm 0.05$  | $4.45 \pm 0.10$    |
| Zr      | $21.47 \pm 0.15$          | $20.21 \pm 0.12$ | $20.10 \pm 0.15$   |

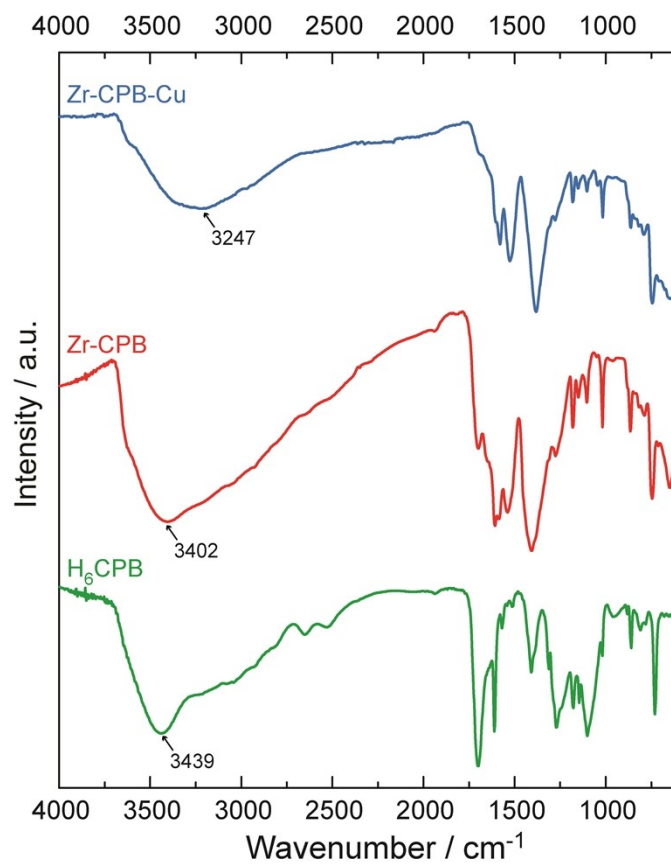

**Figure S4.** FT-IR spectra of H<sub>6</sub>CPB (green), Zr-CPB (red), and Zr-CPB-Cu (blue)

### Section S3. Powder X-Ray Diffraction, Structural Modelling and Refinement of Zr-CPB-Cu

The modeled Zr-CPB-Cu framework was built based on the Zr-CPB (MOF-893) by using Materials Studio 7.0 (Accelrys Software Inc.) software, in which atomic connectivity and monoclinic  $C2/c$  space group were retained. Geometry optimization was subsequently performed by using the universal force field implemented in the *Forcite* module, and the unit cell parameters were optimized until obtaining low energy convergence ( $10^{-4}$  kcal/mol). By using Reflex module, full profile pattern fitting Pawley refinement was evaluated on the experimental PXRD pattern and modeled structure in the  $2\theta$  range from 3.8 to  $50^\circ$ . A Pearson VII function was employed to define the peak profile. The unit cell parameters  $a$ ,  $b$ ,  $c$ , FWHM parameters  $U$ ,  $V$ ,  $W$ , profile parameters  $NA$ ,  $NB$ , zero point, shift#1, and shift#2 were refined. The background coefficients were refined with 30<sup>th</sup> order polynomial. The refined unit cell parameters and fractional atomic coordinates for Zr-CPB were provided in Tables S1.

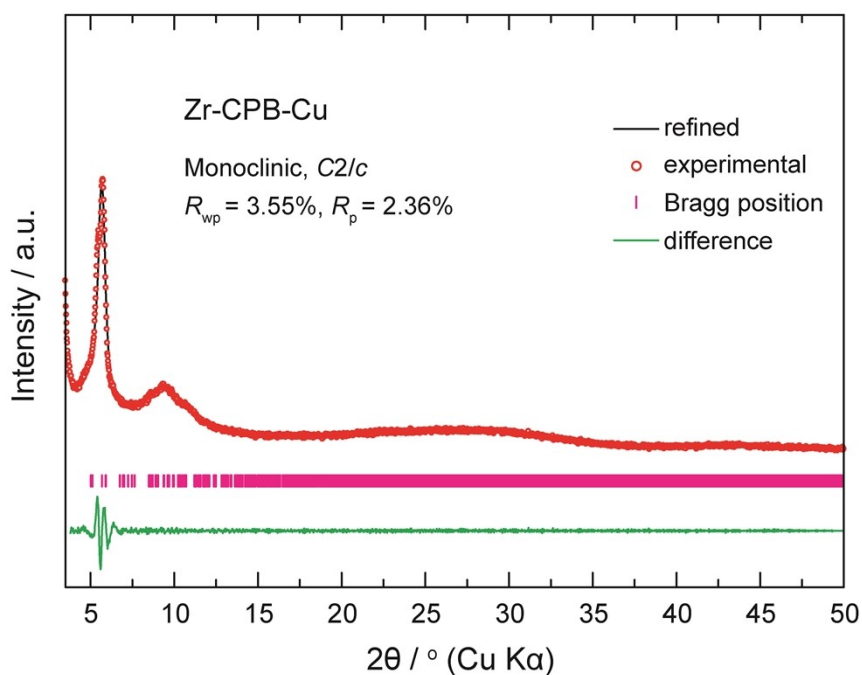

**Figure S5.** The Pawley refinement of Zr-CPB-Cu. Shown are the experimental (black), refined (red), and difference (green) patterns. The Bragg positions are marked as pink bars.



**Table S2.** Unit cell parameters and fractional atomic coordinates for the refined Zr-CPB-Cu.

| Empirical formula, Space group |           | $C_{102}Zr_6Cu_2H_{72}O_{45}$ , $C2/c$                                                                                                            |         |         |                |
|--------------------------------|-----------|---------------------------------------------------------------------------------------------------------------------------------------------------|---------|---------|----------------|
| Refined unit cell              |           | $a = 24.5313 \text{ \AA}$ , $b = 68.4490 \text{ \AA}$ , $c = 19.4107 \text{ \AA}$ , $\alpha = \gamma = 90.0000^\circ$ , $\beta = 92.5973^\circ$ . |         |         |                |
| Pawley refinement              |           | $R_{wp} = 3.55\%$ , $R_{wp}$ (w/o background) = 3.04%, $R_p = 2.36\%$                                                                             |         |         |                |
| Atom label                     | Atom type | $x$                                                                                                                                               | $y$     | $z$     | Site Occupancy |
| Zr1                            | Zr        | 0.15333                                                                                                                                           | 0.35997 | 0.29194 | 1              |
| Zr2                            | Zr        | 0.23753                                                                                                                                           | 0.35956 | 0.15867 | 1              |
| Zr3                            | Zr        | 0.28868                                                                                                                                           | 0.34906 | 0.31446 | 1              |
| Zr4                            | Zr        | 0.19099                                                                                                                                           | 0.40364 | 0.20243 | 1              |
| Zr5                            | Zr        | 0.32584                                                                                                                                           | 0.39072 | 0.23069 | 1              |
| Zr6                            | Zr        | 0.24423                                                                                                                                           | 0.39271 | 0.36151 | 1              |
| O7                             | O         | 0.31353                                                                                                                                           | 0.37818 | 0.3268  | 1              |
| O8                             | O         | 0.30906                                                                                                                                           | 0.36125 | 0.22103 | 1              |
| O9                             | O         | 0.22287                                                                                                                                           | 0.36269 | 0.35858 | 1              |
| O10                            | O         | 0.26098                                                                                                                                           | 0.40637 | 0.26764 | 1              |
| O11                            | O         | 0.25785                                                                                                                                           | 0.38929 | 0.16227 | 1              |
| O12                            | O         | 0.21965                                                                                                                                           | 0.3453  | 0.25107 | 1              |
| O13                            | O         | 0.17493                                                                                                                                           | 0.39013 | 0.29826 | 1              |
| O14                            | O         | 0.17033                                                                                                                                           | 0.37339 | 0.1955  | 1              |
| O15                            | O         | 0.2462                                                                                                                                            | 0.32409 | 0.34731 | 1              |
| O16                            | O         | 0.40569                                                                                                                                           | 0.38116 | 0.25985 | 1              |
| O17                            | O         | 0.1933                                                                                                                                            | 0.43006 | 0.14599 | 1              |
| O18                            | O         | 0.10244                                                                                                                                           | 0.40773 | 0.19841 | 1              |
| O19                            | O         | 0.07158                                                                                                                                           | 0.37126 | 0.26647 | 1              |
| O20                            | O         | 0.11443                                                                                                                                           | 0.33551 | 0.33453 | 1              |
| O21                            | O         | 0.16884                                                                                                                                           | 0.33347 | 0.42839 | 1              |
| O22                            | O         | -0.1304                                                                                                                                           | 0.33592 | 0.27423 | 1              |
| O23                            | O         | -0.17604                                                                                                                                          | 0.34037 | 0.3734  | 1              |
| O24                            | O         | -0.2886                                                                                                                                           | 0.29032 | 0.69575 | 1              |
| O25                            | O         | -0.33189                                                                                                                                          | 0.27752 | 0.60551 | 1              |
| O26                            | O         | -0.22706                                                                                                                                          | 0.16826 | 0.64469 | 1              |
| O27                            | O         | -0.17845                                                                                                                                          | 0.17218 | 0.74668 | 1              |
| O28                            | O         | 0.08692                                                                                                                                           | 0.14397 | 0.62395 | 1              |
| O29                            | O         | 0.14194                                                                                                                                           | 0.16787 | 0.66083 | 1              |
| O30                            | O         | 0.27573                                                                                                                                           | 0.22045 | 0.44931 | 1              |
| O31                            | O         | 0.28336                                                                                                                                           | 0.2221  | 0.56204 | 1              |
| O32                            | O         | 0.1825                                                                                                                                            | 0.39203 | 0.43202 | 1              |

|     |   |          |         |          |   |
|-----|---|----------|---------|----------|---|
| O33 | O | 0.12854  | 0.36682 | 0.39254  | 1 |
| O34 | O | 0.32166  | 0.40228 | 0.73916  | 1 |
| O35 | O | 0.3173   | 0.37142 | 0.70945  | 1 |
| O36 | O | 0.18151  | 0.40153 | 1.09516  | 1 |
| O37 | O | 0.19637  | 0.36945 | 1.07077  | 1 |
| O38 | O | 0.35417  | 0.416   | 0.18293  | 1 |
| O39 | O | 0.30477  | 0.41369 | 0.08461  | 1 |
| O40 | O | 0.64081  | 0.41196 | 0.20252  | 1 |
| O41 | O | 0.69374  | 0.41214 | 0.10875  | 1 |
| O42 | O | 0.82237  | 0.49327 | -0.01541 | 1 |
| O43 | O | 0.81734  | 0.50012 | 0.09435  | 1 |
| O44 | O | 0.27935  | 0.38209 | 0.4541   | 1 |
| O45 | O | 0.3102   | 0.35218 | 0.42093  | 1 |
| O46 | O | 0.35964  | 0.3817  | 0.13724  | 1 |
| O47 | O | 0.29601  | 0.36174 | 0.08391  | 1 |
| O48 | O | 0.19334  | 0.42981 | 0.26076  | 1 |
| O49 | O | 0.21144  | 0.42071 | 0.37297  | 1 |
| C50 | C | 0.1297   | 0.32673 | 0.39044  | 1 |
| C51 | C | 0.10099  | 0.30903 | 0.4127   | 1 |
| C52 | C | 0.0697   | 0.29771 | 0.36526  | 1 |
| H53 | H | 0.06657  | 0.30166 | 0.31126  | 1 |
| C54 | C | 0.04162  | 0.28125 | 0.38749  | 1 |
| H55 | H | 0.0173   | 0.27279 | 0.35038  | 1 |
| C56 | C | 0.04291  | 0.27633 | 0.45774  | 1 |
| C57 | C | 0.07548  | 0.28725 | 0.5047   | 1 |
| H58 | H | 0.07672  | 0.28369 | 0.55913  | 1 |
| C59 | C | 0.10466  | 0.30336 | 0.48233  | 1 |
| H60 | H | 0.12862  | 0.31177 | 0.52001  | 1 |
| C61 | C | 0.00509  | 0.26153 | 0.48464  | 1 |
| C62 | C | 0.0255   | 0.24413 | 0.51519  | 1 |
| C63 | C | -0.01036 | 0.2316  | 0.54928  | 1 |
| C64 | C | -0.06431 | 0.23751 | 0.56023  | 1 |
| C65 | C | -0.08375 | 0.25542 | 0.53293  | 1 |
| C66 | C | -0.0505  | 0.26649 | 0.49002  | 1 |
| C67 | C | 0.11688  | 0.23774 | 0.57376  | 1 |
| H68 | H | 0.0995   | 0.2406  | 0.62307  | 1 |
| C69 | C | 0.0844   | 0.23914 | 0.51257  | 1 |
| C70 | C | 0.108    | 0.23568 | 0.44926  | 1 |
| H71 | H | 0.08354  | 0.23671 | 0.40154  | 1 |
| C72 | C | 0.16319  | 0.23067 | 0.44722  | 1 |
| H73 | H | 0.18035  | 0.22805 | 0.39763  | 1 |

|      |   |          |         |         |   |
|------|---|----------|---------|---------|---|
| C74  | C | 0.19573  | 0.22901 | 0.50854 | 1 |
| C75  | C | 0.17195  | 0.23265 | 0.57184 | 1 |
| H76  | H | 0.1959   | 0.23159 | 0.61996 | 1 |
| C77  | C | 0.25412  | 0.2236  | 0.50654 | 1 |
| C78  | C | 0.00859  | 0.2122  | 0.57348 | 1 |
| C79  | C | 0.02056  | 0.20896 | 0.64379 | 1 |
| H80  | H | 0.01429  | 0.22041 | 0.68115 | 1 |
| C81  | C | 0.04417  | 0.19138 | 0.66554 | 1 |
| H82  | H | 0.05642  | 0.18951 | 0.71942 | 1 |
| C83  | C | 0.0556   | 0.17687 | 0.61729 | 1 |
| C84  | C | 0.03986  | 0.17952 | 0.54765 | 1 |
| H85  | H | 0.04958  | 0.16862 | 0.50968 | 1 |
| C86  | C | 0.01661  | 0.19721 | 0.52574 | 1 |
| H87  | H | 0.00706  | 0.19956 | 0.47135 | 1 |
| C88  | C | 0.09588  | 0.16192 | 0.63634 | 1 |
| C89  | C | -0.10194 | 0.22366 | 0.59283 | 1 |
| C90  | C | -0.10808 | 0.22348 | 0.66442 | 1 |
| H91  | H | -0.08784 | 0.23435 | 0.69704 | 1 |
| C92  | C | -0.13859 | 0.2087  | 0.69459 | 1 |
| H93  | H | -0.14235 | 0.20865 | 0.74996 | 1 |
| C94  | C | -0.16313 | 0.19394 | 0.65344 | 1 |
| C95  | C | -0.15754 | 0.19447 | 0.58173 | 1 |
| H96  | H | -0.17506 | 0.18313 | 0.54873 | 1 |
| C97  | C | -0.12667 | 0.20903 | 0.55205 | 1 |
| H98  | H | -0.11993 | 0.20838 | 0.49749 | 1 |
| C99  | C | -0.19193 | 0.17733 | 0.68406 | 1 |
| C100 | C | -0.13804 | 0.26947 | 0.62572 | 1 |
| H101 | H | -0.10202 | 0.26874 | 0.66002 | 1 |
| C102 | C | -0.13558 | 0.26358 | 0.55674 | 1 |
| C103 | C | -0.18212 | 0.26527 | 0.51259 | 1 |
| H104 | H | -0.18064 | 0.26112 | 0.45888 | 1 |
| C105 | C | -0.23135 | 0.27179 | 0.53832 | 1 |
| H106 | H | -0.26705 | 0.27279 | 0.50362 | 1 |
| C107 | C | -0.23457 | 0.27663 | 0.60849 | 1 |
| C108 | C | -0.18708 | 0.27587 | 0.65149 | 1 |
| H109 | H | -0.18809 | 0.27973 | 0.70553 | 1 |
| C110 | C | -0.28729 | 0.28188 | 0.63752 | 1 |
| C111 | C | -0.07316 | 0.28342 | 0.45105 | 1 |
| C112 | C | -0.08954 | 0.28123 | 0.38118 | 1 |
| H113 | H | -0.08782 | 0.26702 | 0.35677 | 1 |
| C114 | C | -0.10795 | 0.29733 | 0.34243 | 1 |

|      |   |          |         |         |   |
|------|---|----------|---------|---------|---|
| H115 | H | -0.12204 | 0.29527 | 0.28927 | 1 |
| C116 | C | -0.11128 | 0.31571 | 0.37365 | 1 |
| C117 | C | -0.0951  | 0.31779 | 0.44383 | 1 |
| H118 | H | -0.09862 | 0.33174 | 0.46954 | 1 |
| C119 | C | -0.07556 | 0.3018  | 0.48204 | 1 |
| H120 | H | -0.06279 | 0.3037  | 0.53578 | 1 |
| C121 | C | -0.14021 | 0.33185 | 0.33789 | 1 |
| C122 | C | 0.14152  | 0.38043 | 0.43643 | 1 |
| C123 | C | 0.10694  | 0.38305 | 0.49636 | 1 |
| C124 | C | 0.11     | 0.40053 | 0.53449 | 1 |
| H125 | H | 0.13634  | 0.41236 | 0.51958 | 1 |
| C126 | C | 0.07991  | 0.40286 | 0.59318 | 1 |
| H127 | H | 0.08424  | 0.41619 | 0.62295 | 1 |
| C128 | C | 0.04677  | 0.38767 | 0.61558 | 1 |
| C129 | C | 0.04143  | 0.37055 | 0.57604 | 1 |
| H130 | H | 0.01616  | 0.35865 | 0.59284 | 1 |
| C131 | C | 0.07108  | 0.36829 | 0.51659 | 1 |
| H132 | H | 0.06741  | 0.35473 | 0.48796 | 1 |
| C133 | C | 0.02347  | 0.38877 | 0.68468 | 1 |
| C134 | C | 0.05858  | 0.3889  | 0.74427 | 1 |
| C135 | C | 0.03669  | 0.38905 | 0.81021 | 1 |
| C136 | C | 0.07362  | 0.38877 | 0.87244 | 1 |
| C137 | C | 0.10622  | 0.37235 | 0.88649 | 1 |
| H138 | H | 0.10318  | 0.35963 | 0.85332 | 1 |
| C139 | C | 0.1426   | 0.37215 | 0.9436  | 1 |
| H140 | H | 0.16633  | 0.35903 | 0.95376 | 1 |
| C141 | C | 0.14663  | 0.38832 | 0.98837 | 1 |
| C142 | C | 0.11436  | 0.40491 | 0.97343 | 1 |
| H143 | H | 0.11582  | 0.41747 | 1.00739 | 1 |
| C144 | C | 0.07804  | 0.40511 | 0.9158  | 1 |
| H145 | H | 0.05325  | 0.41794 | 0.90506 | 1 |
| C146 | C | 0.17766  | 0.38648 | 1.05512 | 1 |
| C147 | C | 0.23311  | 0.38768 | 0.72905 | 1 |
| C148 | C | 0.20688  | 0.40456 | 0.75224 | 1 |
| H149 | H | 0.23019  | 0.41741 | 0.76744 | 1 |
| C150 | C | 0.15021  | 0.40498 | 0.75667 | 1 |
| H151 | H | 0.13076  | 0.41809 | 0.77497 | 1 |
| C152 | C | 0.11877  | 0.38857 | 0.73788 | 1 |
| C153 | C | 0.14463  | 0.37174 | 0.71419 | 1 |
| H154 | H | 0.12088  | 0.35892 | 0.69975 | 1 |
| C155 | C | 0.20132  | 0.37128 | 0.70977 | 1 |

|      |   |         |         |          |   |
|------|---|---------|---------|----------|---|
| H156 | H | 0.22028 | 0.35809 | 0.69154  | 1 |
| C157 | C | 0.29328 | 0.38711 | 0.7256   | 1 |
| C158 | C | 0.30319 | 0.36565 | 0.46615  | 1 |
| C159 | C | 0.32435 | 0.36189 | 0.53819  | 1 |
| C160 | C | 0.19697 | 0.43327 | 0.32624  | 1 |
| C161 | C | 0.18484 | 0.45354 | 0.34921  | 1 |
| C162 | C | 0.34194 | 0.37081 | 0.08676  | 1 |
| C163 | C | 0.37735 | 0.3686  | 0.02673  | 1 |
| C164 | C | 0.34068 | 0.4223  | 0.12268  | 1 |
| C165 | C | 0.36994 | 0.43906 | 0.09604  | 1 |
| C166 | C | 0.38758 | 0.45402 | 0.14105  | 1 |
| H167 | H | 0.37595 | 0.45409 | 0.19414  | 1 |
| C168 | C | 0.42012 | 0.46903 | 0.11759  | 1 |
| H169 | H | 0.43318 | 0.4806  | 0.15266  | 1 |
| C170 | C | 0.43594 | 0.46906 | 0.04922  | 1 |
| C171 | C | 0.41735 | 0.45442 | 0.00358  | 1 |
| H172 | H | 0.42868 | 0.45459 | -0.0497  | 1 |
| C173 | C | 0.38414 | 0.4395  | 0.02684  | 1 |
| H174 | H | 0.37104 | 0.42799 | -0.00847 | 1 |
| C175 | C | 0.46944 | 0.48516 | 0.02449  | 1 |
| C176 | C | 0.52701 | 0.48365 | 0.02786  | 1 |
| C177 | C | 0.55815 | 0.49936 | 0.00383  | 1 |
| C178 | C | 0.55523 | 0.46569 | 0.05565  | 1 |
| C179 | C | 0.55324 | 0.46078 | 0.12564  | 1 |
| H180 | H | 0.52983 | 0.46958 | 0.15992  | 1 |
| C181 | C | 0.58303 | 0.44489 | 0.15271  | 1 |
| H182 | H | 0.58028 | 0.44154 | 0.20687  | 1 |
| C183 | C | 0.61746 | 0.43396 | 0.11118  | 1 |
| C184 | C | 0.6191  | 0.43878 | 0.04085  | 1 |
| H185 | H | 0.64482 | 0.43063 | 0.00722  | 1 |
| C186 | C | 0.58776 | 0.45431 | 0.01327  | 1 |
| H187 | H | 0.58998 | 0.45781 | -0.04094 | 1 |
| C188 | C | 0.65277 | 0.41824 | 0.14234  | 1 |
| C189 | C | 0.73331 | 0.49741 | 0.02766  | 1 |
| C190 | C | 0.70709 | 0.49473 | -0.03762 | 1 |
| H191 | H | 0.73051 | 0.49215 | -0.0827  | 1 |
| C192 | C | 0.6502  | 0.49537 | -0.04543 | 1 |
| H193 | H | 0.63073 | 0.49312 | -0.09599 | 1 |
| C194 | C | 0.61863 | 0.49872 | 0.01178  | 1 |
| C195 | C | 0.64449 | 0.50128 | 0.07702  | 1 |
| H196 | H | 0.62052 | 0.5038  | 0.12169  | 1 |

|       |    |         |         |         |   |
|-------|----|---------|---------|---------|---|
| C197  | C  | 0.70136 | 0.50064 | 0.08495 | 1 |
| H198  | H  | 0.7203  | 0.50268 | 0.13592 | 1 |
| C199  | C  | 0.7936  | 0.49691 | 0.0359  | 1 |
| Cu200 | Cu | 0.90118 | 0.62042 | 0.81347 | 1 |
| H201  | H  | 0.58565 | 0.6242  | 0.9665  | 1 |
| H202  | H  | 0.64607 | 0.62734 | 1.02209 | 1 |
| H203  | H  | 0.61348 | 0.35295 | 0.48059 | 1 |
| H204  | H  | 1.21477 | 0.46393 | 0.32588 | 1 |
| H205  | H  | 1.1908  | 0.45475 | 0.4063  | 1 |
| H206  | H  | 1.14365 | 0.45747 | 0.33273 | 1 |
| Cu207 | Cu | 0.89753 | 0.60581 | 0.71924 | 1 |
| H208  | H  | 0.91598 | 0.59178 | 0.84969 | 1 |
| H209  | H  | 0.04762 | 0.3728  | 0.30576 | 1 |
| H210  | H  | 0.59152 | 0.63344 | 0.76076 | 1 |
| H211  | H  | 0.57054 | 0.61189 | 0.76751 | 1 |
| H212  | H  | 0.84614 | 0.56654 | 0.86179 | 1 |
| H213  | H  | 0.73327 | 0.68246 | 0.61405 | 1 |
| H214  | H  | 0.75208 | 0.68736 | 0.69005 | 1 |
| O215  | O  | 0.92463 | 0.59074 | 0.64752 | 1 |
| O216  | O  | 0.93719 | 0.62921 | 0.89522 | 1 |
| H217  | H  | 0.96838 | 0.63697 | 0.87965 | 1 |
| H218  | H  | 0.91265 | 0.63897 | 0.91477 | 1 |
| H219  | H  | 0.92826 | 0.57741 | 0.66702 | 1 |
| H220  | H  | 0.96268 | 0.59525 | 0.64329 | 1 |
| H221  | H  | 0.64695 | 0.62795 | 0.4473  | 1 |
| H222  | H  | 0.65671 | 0.65391 | 0.45917 | 1 |
| H223  | H  | 0.7114  | 0.63913 | 0.428   | 1 |

## Section S4: Gas Adsorption Studies of Zr-MOFs

### Gas selectivity calculated by Henry's Law

Virial-type equation was employed for estimation of Henry's constant:

$$\ln P = \ln N + \frac{1}{T} \sum_{i=0}^m a_i N^i + \sum_{i=0}^n b_i N^i$$

Where  $P$  is pressure,  $N$  is the adsorbed amount,  $T$  is temperature,  $a_i$  and  $b_i$  are virial coefficient, and  $m$  and  $n$  are the number of virial coefficients required for adequate fitting of the isotherms. As a result, Henry's constant ( $K_H$ ) at the temperature  $T$  can be calculated:

$$K_H = \exp(-b_0) \cdot \exp(-a_0/T)$$

The Henry's Law selectivity for gas component  $i$  over  $j$  is calculated:

$$S_{ij} = K_{Hi}/K_{Hj}$$

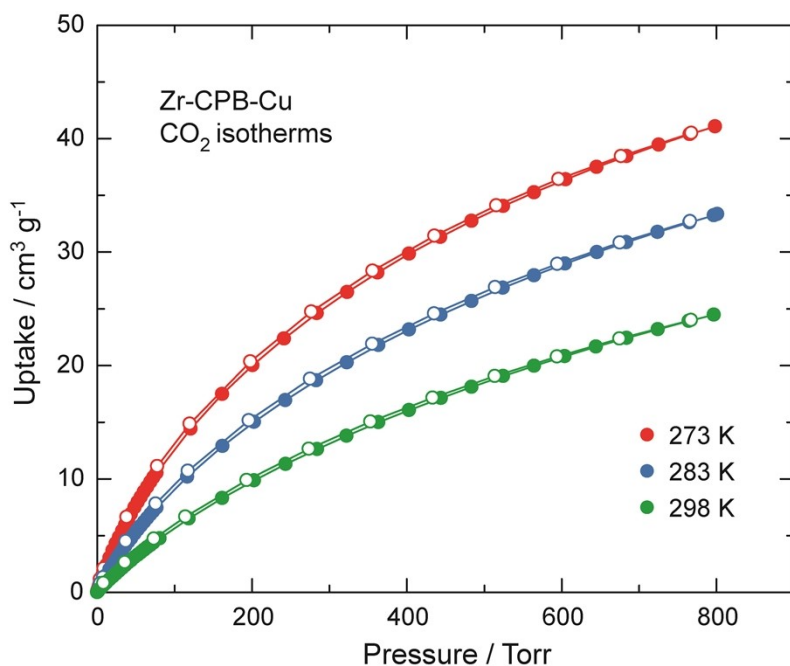

**Figure S6.** CO<sub>2</sub> isotherms for Zr-CPB-Cu at 273 (red), 283 (blue), and 298 K (green). Filled and open symbols represent adsorption and desorption branches, respectively. The connecting curves are guides for the eye.

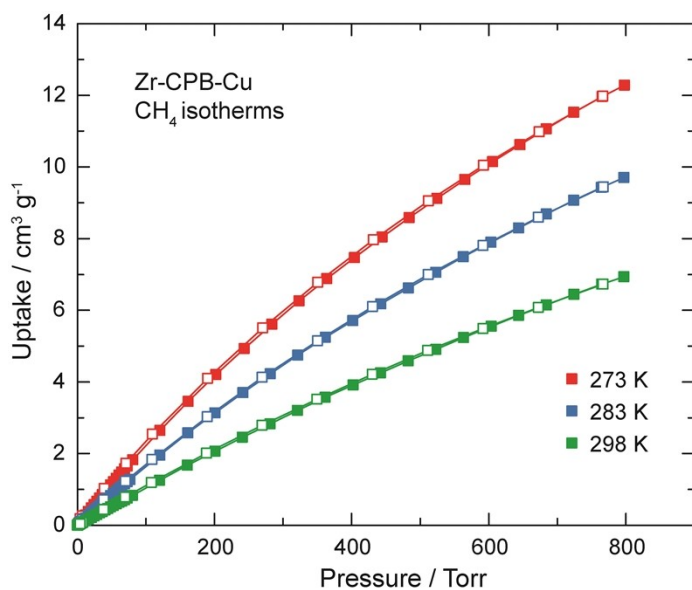

**Figure S7.** CH<sub>4</sub> isotherms for Zr-CPB-Cu at 273 (red), 283 (blue), and 298 K (green). Filled and open symbols represent adsorption and desorption branches, respectively. The connecting curves are guides for the eye.

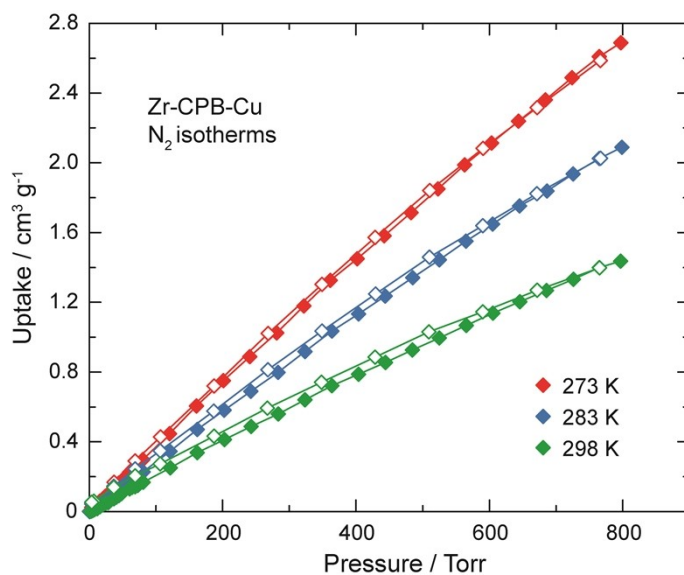

**Figure S8.** N<sub>2</sub> isotherms for Zr-CPB-Cu at 273 (red), 283 (blue), and 298 K (green). Filled and open symbols represent adsorption and desorption branches, respectively. The connecting curves are guides for the eye.



## Section S5: Catalytic Oxidative Carboxylation Studies of Zr-MOFs

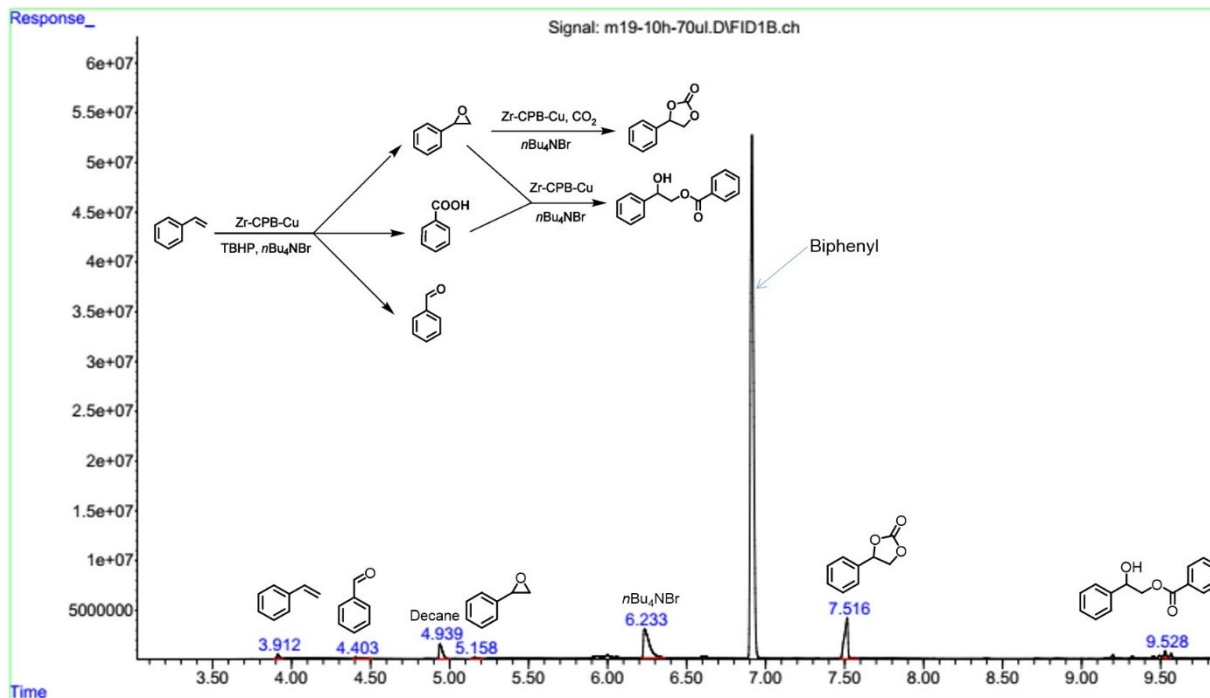

**Figure S9.** GC chart of the oxidative carboxylation reaction catalyzed by Zr-CPB-Cu after 12 h.

**Table S3.** Optimization of Zr-CPB-Cu amount for catalysis oxidative carboxylation of styrene and CO<sub>2</sub><sup>a</sup>

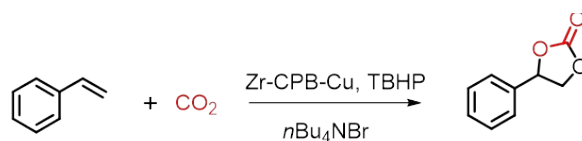

| # | Amount/ mol % | Conversion/ % | Selectivity/ % | Yield/%           |               |
|---|---------------|---------------|----------------|-------------------|---------------|
|   |               |               |                | Styrene carbonate | Styrene oxide |
| 1 | 0.1           | 87            | 93             | 81                | 5             |
| 2 | 0.2           | 97            | 95             | 92                | 0             |
| 3 | 0.3           | 95            | 87             | 82                | 0             |
| 4 | 0.4           | 93            | 73             | 68                | 0             |
| 5 | No-MOF        | 87            | 45             | 39                | 10            |

<sup>a</sup>Reaction conditions: styrene (3.9 mmol), TBHP in decane (7.4 mmol), *n*Bu<sub>4</sub>NBr (8 mol %), CO<sub>2</sub> (balloon pressure), 80 °C, 12 h. The catalytic conversion of styrene, selectivity of styrene carbonate, and yield of products were quantified by GC-FID with the use of biphenyl as the internal standard.

**Table S4.** Oxidative carboxylation reactions catalyzed by Zr-CPB-Cu with different oxidants and co-catalysts.<sup>a</sup>

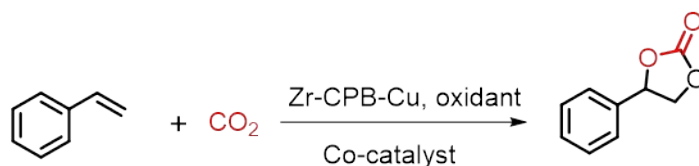

| # | Oxidant                       | Co-catalyst                  | Conversion/ %                | Selectivity/ % | Yield/ % |
|---|-------------------------------|------------------------------|------------------------------|----------------|----------|
| 1 | TBHP in decane                |                              | 97                           | 95             | 92       |
| 2 | TBHP in water                 | <i>n</i> Bu <sub>4</sub> NBr | 97                           | 86             | 83       |
| 3 | H <sub>2</sub> O <sub>2</sub> |                              | 70                           | 62             | 43       |
| 4 | NBS                           |                              | 56                           | 85             | 48       |
| 5 |                               |                              | <i>n</i> Bu <sub>4</sub> NCl | 94             | 70       |
| 6 | TBHP in decane                | HTAB                         | 79                           | 86             | 68       |
| 7 |                               | DPIC                         | 64                           | 62             | 40       |
| 8 |                               | DBU                          | 78                           | 74             | 58       |
| 9 |                               | DMAP                         | 72                           | 56             | 40       |

<sup>a</sup>Reaction conditions: styrene (3.9 mmol), styrene:oxidant (1:2), Zr-CPB-Cu (0.2 mol%), CO<sub>2</sub> (balloon pressure), 80 °C, 12 h, and co-catalyst (8 mol%). The catalytic conversion, selectivity, and yield were determined by GC-FID analysis using biphenyl as the internal standard. NBS: *N*-bromosuccinimide, *n*Bu<sub>4</sub>NCl: tetrabutylammonium chloride, HTAB: hexadecyltrimethylammonium bromide, DPIC: 1,3-bis(2,6-diisopropylphenyl)imidazolium chloride, DBU: 1,8-Diazabicyclo[5.4.0]undec-7-ene, and DMAP: 4-dimethylaminopyridine.

**Table S5.** Comparison of different catalysts for oxidative carboxylation of styrene and CO<sub>2</sub>.<sup>a</sup>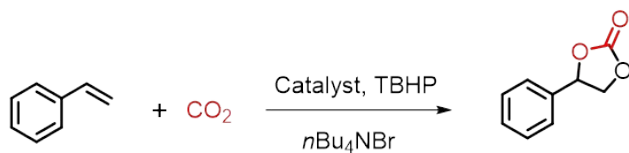

| # | Type  | Catalyst                                                                          | S <sub>BET</sub> / m <sup>2</sup><br>g <sup>-1</sup> | CO <sub>2</sub> uptake/<br>cm <sup>3</sup> g <sup>-1</sup> | Con.<br>/% <sup>c</sup> | Sel.<br>/% <sup>c</sup> | Yield<br>/ % |
|---|-------|-----------------------------------------------------------------------------------|------------------------------------------------------|------------------------------------------------------------|-------------------------|-------------------------|--------------|
| 1 |       | ZrOCl <sub>2</sub> ·8H <sub>2</sub> O                                             | -                                                    | -                                                          | 86                      | 54                      | 46           |
| 2 |       | CuCl <sub>2</sub>                                                                 | -                                                    | -                                                          | 82                      | 45                      | 37           |
| 3 | Homo. | H <sub>6</sub> CPB                                                                | -                                                    | -                                                          | 78                      | 50                      | 39           |
| 4 |       | H <sub>6</sub> CPB + ZrOCl <sub>2</sub> ·8H <sub>2</sub> O +<br>CuCl <sub>2</sub> | -                                                    | -                                                          | 87                      | 58                      | 50           |
| 5 |       | Cu-CPB <sup>[1]</sup>                                                             | 300                                                  | 58                                                         | 65                      | 74                      | 48           |
| 6 | MOF   | HKUST-1 <sup>[1]</sup>                                                            | 1650                                                 | 107                                                        | 55                      | 78                      | 43           |
| 7 |       | Zr-bpydc <sup>[1]</sup>                                                           | 2110                                                 | 33                                                         | 88                      | 65                      | 57           |
| 8 |       | ZIF-8 <sup>[1]</sup>                                                              | 1675                                                 | 16                                                         | 67                      | 90                      | 60           |

<sup>a</sup>Reaction conditions: styrene (3.9 mmol), catalyst (0.2 mol %, based on molecular weight), TBHP in decane (7.4 mmol), *n*Bu<sub>4</sub>NBr (8 mol %), CO<sub>2</sub> (balloon pressure), 80 °C, 12 h. The catalytic conversion (Con.) of styrene, selectivity (Sel.) of styrene carbonate, and yield of products were quantified by GC-FID analysis and the use of biphenyl as the internal standard.

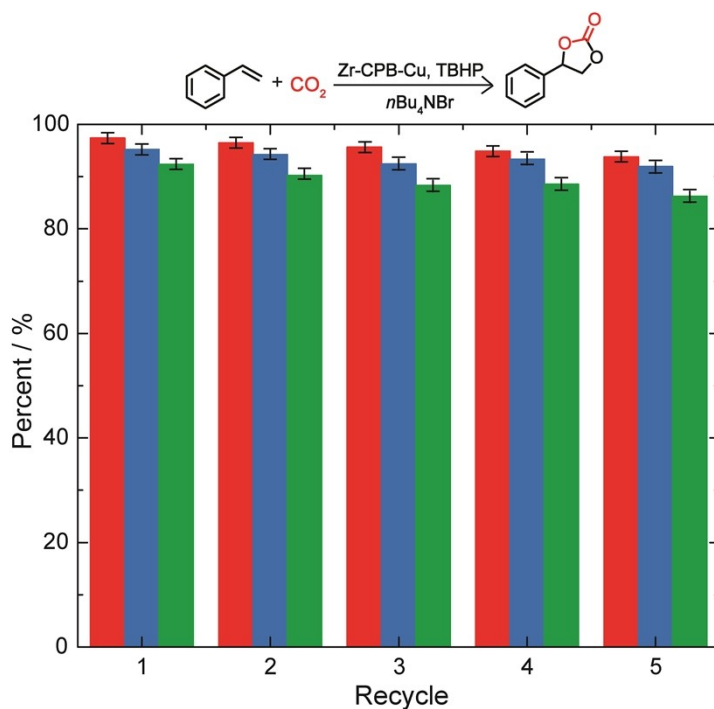

**Figure S10.** Recyclability of the Zr-CPB-Cu in the oxidative carboxylation of styrene and CO<sub>2</sub>.

#### Styrene carbonate<sup>[2-5]</sup>

<sup>1</sup>H NMR (500 MHz, DMSO)  $\delta$  7.42–7.48 (m, 5H), 5.85 (t, 1H,  $J = 7.5, 8.0$  Hz), 4.87 (t, 1H,  $J = 8.0, 8.5$  Hz), 4.40 (t, 1H,  $J = 8.0, 8.5$  Hz) ppm.

<sup>13</sup>C NMR (126 MHz, CDCl<sub>3</sub>)  $\delta$  155.2, 136.8, 129.8, 129.4, 127.1, 78.2, 71.3 ppm.

GC-MS (EI, 70 eV)  $m/z$ : 164 ([M]<sup>+</sup>), 119, 105, 90.

#### 4-chlorostyrene carbonate<sup>[2-6]</sup>

<sup>1</sup>H NMR (400MHz, CDCl<sub>3</sub>)  $\delta$  7.27 – 7.32 (2H, m), 7.42 – 7.44 (2H,m), 5.66 (ddt, 1H,  $J = 7.96, 7.96$  Hz), 4.80 (dd, 1H,  $J = 8.43, 8.43$  Hz), 4.31 (dd, 1H,  $J = 7.85, 7.89$  Hz) ppm.

<sup>13</sup>C NMR (100 MHz, CDCl<sub>3</sub>)  $\delta$  154.4, 135.8, 134.3, 129.5, 127.2, 77.2, 70.9 ppm.

GC-MS (EI, 70 V).  $m/z$  (70 eV): 201, 199, 139, 138, 127, 91, 90, 89.

#### 4-methoxystyrene carbonate<sup>[4,5]</sup>

$^1\text{H}$  NMR (400 MHz,  $\text{CDCl}_3$ )  $\delta$  3.83 (3H, s), 4.35 (1H, dd,  $J = 8.14$ ,  $J = 8.17$ ), 4.75 (1H, dd,  $J = 8.17$ ,  $J = 8.17$ ), 5.62 (1H, dd,  $J = 8.05$ ,  $J = 8.11$ ), 6.94 – 6.97 (2H, dd, m), 7.26-7.32 (2H, m) ppm.

$^{13}\text{C}$  NMR (101MHz,  $\text{CDCl}_3$ )  $\delta$  55.4, 71.1, 78.1, 114.6, 127.4, 127.8, 154.9, 160.8 ppm.

GC-MS (EI, 70 V).  $m/z$  (70 eV): 195, 194, 151, 150, 121, 91, 63.

#### **Allylbenzene carbonate**<sup>[6,7]</sup>

$^1\text{H}$  NMR (400 MHz,  $\text{CDCl}_3$ )  $\delta$  7.44 – 7.15 (m, 5H), 5.07 – 4.85 (m, 1H), 4.54 – 4.38 (dd, 1H), 4.28 – 4.12 (dd, 1H), 3.28 – 3.12 (dd, 1H), 3.09 – 2.86 (dd, 1H) ppm.

$^{13}\text{C}$  NMR (101 MHz,  $\text{CDCl}_3$ )  $\delta$  154.8, 133.9, 129.4, 129.3, 129.0, 129.0, 127.6, 76.8, 68.5, 39.6 ppm.

GC-MS (EI, 70 V)  $m/z$ : 178, 105, 103, 92, 91, 77, 65, 51.

#### **Allyltoluene carbonate**<sup>[7,8]</sup>

$^1\text{H}$  NMR (400 MHz,  $\text{CDCl}_3$ )  $\delta$  7.24 – 7.07 (m, 5H), 4.97 – 4.85 (dd, 1H), 4.48 – 4.35 (dd, 1H), 4.24 – 4.12 (dd, 1H), 3.23 – 3.09 (dd, 1H), 3.00 – 2.86 (dd, 1H), 2.37-2.28 (s, 3H) ppm.

$^{13}\text{C}$  NMR (101 MHz,  $\text{CDCl}_3$ )  $\delta$  154.5, 137.3, 130.3, 129.7, 129.7, 129.2, 129.2, 76.9, 68.4, 39.2, 21.1 ppm.

GC-MS (EI, 70 V)  $m/z$ : 192, 105, 91, 77, 65, 51.

#### **4-allylanisole carbonate**<sup>[7,8]</sup>

$^1\text{H}$  NMR (400 MHz,  $\text{CDCl}_3$ )  $\delta$  7.21 – 7.10 (m, 2H), 6.96 – 6.79 (m, 2H), 5.00 – 4.83 (dtd, 1H), 4.50 – 4.39 (dd, 1H), 4.24 – 4.13 (dd, 1H), 3.85 – 3.79 (s, 3H), 3.18 – 3.06 (dd, 1H), 3.02 – 2.87 (dd, 1H) ppm.

$^{13}\text{C}$ -NMR (101 MHz,  $\text{CDCl}_3$ )  $\delta$  159.1, 154.8, 130.4(2), 125.7, 114.4(2), 77.0, 68.4, 55.3, 38.70 ppm.

GC-MS (EI, 70 V).  $m/z$ : 208, 122, 121, 91, 91, 77, 65, 51.

#### **Dec-1-ene carbonate**<sup>[5,7]</sup>

$^1\text{H}$  NMR (400 MHz,  $\text{CDCl}_3$ )  $\delta$  4.81 – 4.64 (m, 1H), 4.59 – 4.46 (dd, 1H), 4.16 – 3.97 (dd, 1H), 1.90 – 1.75 (m, 1H), 1.75 – 1.60 (m, 1H), 1.55 – 1.16 (m, 12H), 1.02 – 0.74 (m, 3H) ppm.

$^{13}\text{C}$  NMR (100 MHz,  $\text{CDCl}_3$ )  $\delta$  155.1, 77.1, 69.4, 33.90, 31.8, 29.3, 29.1, 29.1, 24.4, 22.6, 14.1 ppm.

GC-MS (EI, 70 V).  $m/z$  (70 eV): 201 ( $[\text{MH}]^+$ ), 110, 96, 81, 67, 55.

***Cis-Cyclohexene carbonate***<sup>[1,9]</sup>

$^1\text{H}$  NMR (500 MHz,  $\text{CDCl}_3$ )  $\delta$  4.67 – 4.63 (m, 2H), 1.90 – 1.80 (m, 4H), 1.61 – 1.53 (m, 2H), 1.42 – 1.35 (m, 2H) ppm

$^{13}\text{C}$  NMR (126 MHz,  $\text{CDCl}_3$ )  $\delta$  155.21, 73.7, 70.7, 19.2 ppm.

GC-MS (EI, 70 eV)  $m/z$ : 142 ( $[\text{M}]^+$ ), 97, 83, 69, 55, 41, 27, 17.

## Section S6: Post-Cycling Characterizations of Zr-CPB-Cu

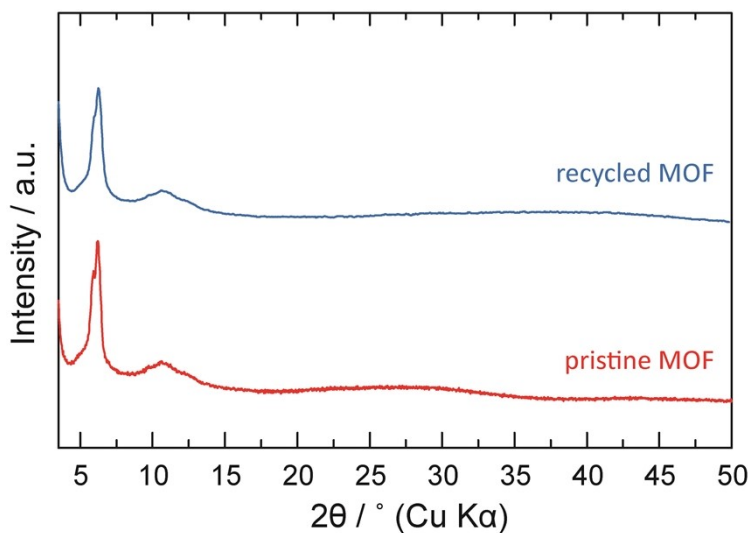

**Figure S11.** PXRD patterns of pristine (red) and recycled (blue) Zr-CPB-Cu catalyst.

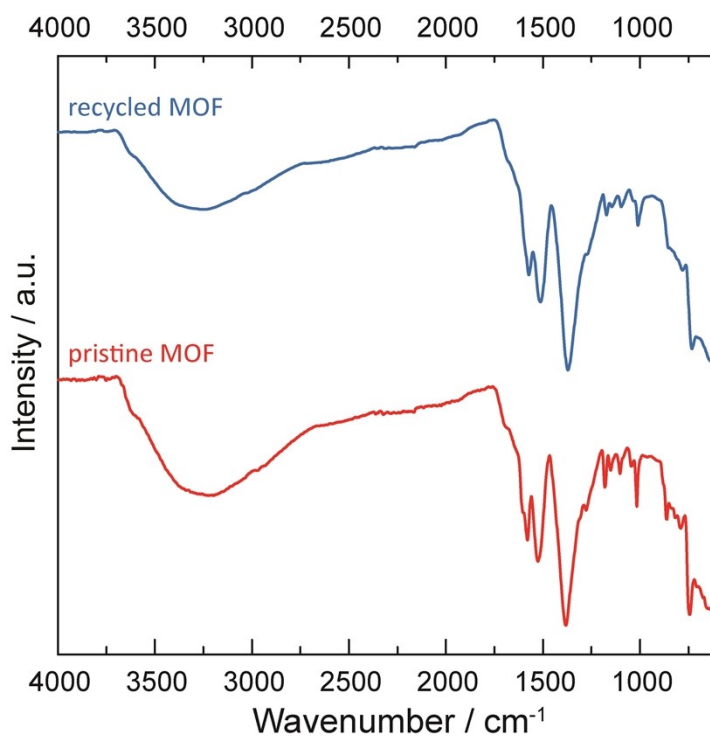

**Figure S12.** FTIR of pristine (red) and recycled (blue) Zr-CPB-Cu catalyst.

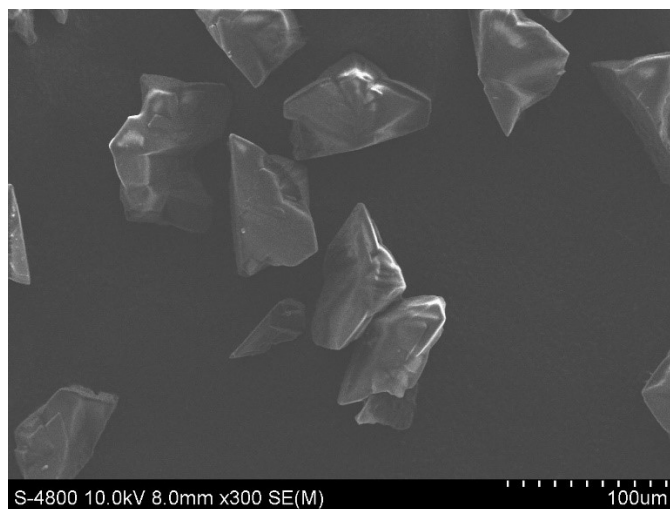

**Figure S13.** SEM image of the Zr-CPB-Cu after several catalytic reactions.



## Section S6: References

- [1] P. T. K. Nguyen, H. T. D. Nguyen, H. N. Nguyen, C. A. Trickett, Q. T. Ton, E. Gutiérrez-Puebla, M. A. Monge, K. E. Cordova and F. Gándara, *ACS Appl. Mater. Interfaces*, 2018, **10**, 733-744.
- [2] R. Das, S. Kamra and C. M. Nagaraja, *Inorg. Chem. Front.*, 2023, **10**, 2088-2099.
- [3] Wang, W. Qiao, H. Liu, S. Li, J. Wu and H. Hou, *Inorg. Chem.*, 2023, **62**, 3817-3826.
- [4] N. Sharma, S. S. Dhankhar, S. Kumar, T. J. D. Kumar and C. M. Nagaraja, *Chem. Eur. J.*, 2018, **24**, 16662-16669.
- [5] J. A. Castro-Osma, A. Lara-Sánchez, M. North, A. Otero and P. Villuendas, *Catal. Sci. Technol.*, 2012, **2**, 1021-1026.
- [6] Y. Hou, X. Wang, Y. Guo and X. Zhang, *Nanoscale*, 2021, **13**, 18695–18701.
- [7] R. Calmanti, M. Selva and A. Perosa, *Green Chem.*, 2021, **23**, 7609–7619.
- [8] N. Eghbalia and C.-J. Li, *Green Chem.*, 2007, **9**, 213–215.
- [9] P. Ramidi, C.M. Felton, B.P. Subedi, H. Zhou, Z.R. Tian, Y. Gartia, B.S. Pierce and A. Ghosh, *J. CO<sub>2</sub> Util.*, 2015, **9**, 48–57.
